# Supplementary material for: Machine learning models for dementia risk prediction: Evidence from the Sydney Memory and Ageing Study
Source: Research Square preprint supplement (doi:10.21203/rs.3.rs-7872424/v1), 2025-11-11
Supplement: Supplementary file 1 [file 9f78e07e6130ac5d7f9fd398.xlsx]

## Sheet: Settings
INSTRUCTIONS	Enter prevalence as PROPORTIONS (e.g., 0.18 = 18%). The model adjusts the intercept via: new_intercept = base_intercept + LN(TargetPrev / StudyPrevFixed). For ages <70, TargetPrev comes from the age band; for ≥70, it comes from the overall 70+ field below.
BaseIntercept	-6.937
Threshold	0.277
StudyPrevFixed (10y prevalence in training cohort, 70+)	0.14
TargetPrev_70plus (overall prevalence for target population, 70+)	0.14
AgeBand (<70)	TargetPrev_band (proportion)
40–49	0.0004
50–59	0.003
60–69	0.018
Status	OK
Reference	Age-band defaults are conservative global approximations (GBD 2019 / Nichols et al., Lancet Public Health 2022). Replace with national/local estimates when available.

## Sheet: Calculator
Age	Cognition	Glucose	CVDRisk	AgeBand	AdjIntercept (used)	Predicted Risk	Classification
75	-0.4	5.8	20	70+ (baseline)	-6.937	0.237361	Lower risk
55	0.1	5.2	12	50–59	-10.78	0.00111117	Lower risk
45	0	5	10	40–49	-12.7949	7.56034e-05	Lower risk
85	-1	7	30	70+ (baseline)	-6.937	0.522485	At risk
				40–49	-12.7949	2.77479e-06	Lower risk
				40–49	-12.7949	2.77479e-06	Lower risk
				40–49	-12.7949	2.77479e-06	Lower risk
				40–49	-12.7949	2.77479e-06	Lower risk
Notes	For ages ≥70, the intercept is adjusted using TargetPrev_70plus vs StudyPrevFixed (70+). For ages <70, the intercept is adjusted using the age-band TargetPrev vs StudyPrevFixed. Age effects come from the age coefficient; intercept shifts re-anchor baseline prevalence only.
